# Supplementary material for: Entwicklungen des Insektizid-Einsatzes in Winterraps (Brassica napus L.) infolge des Anwendungsverbotes neonicotinoider Beizen
Source: Springer Nature journal article supplement (doi:10.1007/s10343-021-00572-4), 2021-07-06
Supplement: MOESM1 [file 19337694]

Tabelle A1

Anteil der Anbaufläche mit Lumiposa 625 FS-Beize an der Winterrapsanbaufläche der 17 Referenzbetrieben aus Mecklenburg-Vorpommern; die Fläche in ha ist jeweils die Summe aus den Erntejahren 2017, 2018 und 2019

| <b>Betrieb</b> | <b>Fläche (ha) mit Winterraps 2017-2019</b> | <b>Fläche (ha) Lumiposa 625 FS-Beize 2017 - 2019</b> | <b>Relativer Flächenanteil Lumiposa 625 FS-Beize an Gesamtfläche (%)</b> | <b>BKR</b> |
|----------------|---------------------------------------------|------------------------------------------------------|--------------------------------------------------------------------------|------------|
| 3              | 373                                         | 73                                                   | 19,57                                                                    | 101        |
| 4              | 1 245,03                                    | 107                                                  | 8,59                                                                     | 101        |
| 6              | 1 002,16                                    | 0                                                    | 0                                                                        | 101        |
| 14             | 854,72                                      | 0                                                    | 0                                                                        | 101        |
| 53             | 229,62                                      | 0                                                    | 0                                                                        | 101        |
| 54             | 702,01                                      | 0                                                    | 0                                                                        | 101        |
| 57             | 1 194,99                                    | 0                                                    | 0                                                                        | 101        |
| 61             | 1 203,28                                    | 89,40                                                | 7,43                                                                     | 101        |
| 69             | 267,05                                      | 0                                                    | 0                                                                        | 101        |
| 133            | 561,30                                      | 71                                                   | 12,65                                                                    | 101        |
| 8              | 100,37                                      | 0                                                    | 0                                                                        | 102        |
| 15             | 969,01                                      | 51                                                   | 5,26                                                                     | 102        |
| 58             | 1 233,25                                    | 0                                                    | 0                                                                        | 102        |
| 59             | 422,58                                      | 0                                                    | 0                                                                        | 102        |
| 2              | 2 455,66                                    | 526                                                  | 21,42                                                                    | 158        |
| 7              | 1 560,39                                    | 0                                                    | 0                                                                        | 158        |
| 56             | 1 050,79                                    | 168                                                  | 15,99                                                                    | 158        |
